# Supplementary material for: ABC Transporter Genes and Risk of Type 2 Diabetes: A study of 40,000 individuals from the general population
Source: PubMed Central journal article supplement — Diabetes Care. 2012 Nov 14;35(12):2600–6. doi: 10.2337/dc12-0082 (PMC3507608; doi:10.2337/dc12-0082), 2012-11-14

**Supplementary Table 1.** Clinical and laboratory characteristics of subjects by study and type 2 diabetes status.

|                                      | <b>Copenhagen City Heart Study</b> |                        | <b>Copenhagen General Population Study</b> |                        |
|--------------------------------------|------------------------------------|------------------------|--------------------------------------------|------------------------|
|                                      | <b>No event</b>                    | <b>Type 2 Diabetes</b> | <b>No event</b>                            | <b>Type 2 diabetes</b> |
| No. of subjects                      | 9,396                              | 789                    | 29,179                                     | 1,236                  |
| Age (years)                          | 58 (43-69)                         | 64 (57-71)*            | 60 (50-69)                                 | 66 (59-73)*            |
| Sex (F/M)                            | 5,318/4,078                        | 357/432                | 15,508/14,091                              | 523/741                |
| HbA1c (%)                            | 5.8 (5.5-6.1)                      | 6.9 (6.3-7.9)*         | NA                                         | NA                     |
| Total cholesterol (mmol/L)           | 5.9 (5.1-6.8)                      | 6.3 (5.5-7.1)*         | 5.7 (5.0-6.4)                              | 5.1 (4.3-5.9)*         |
| LDL cholesterol (mmol/L)             | 3.6 (2.9-4.4)                      | 3.8 (3.0-4.6)*         | 3.2 (2.6-3.9)                              | 2.6 (1.9-3.3)*         |
| Apolipoprotein B (mg/dL)             | 84 (70-100)                        | 94 (78-109)*           | 110 (91-134)                               | 110 (87-140)           |
| HDL cholesterol (mmol/L)             | 1.5 (1.2-1.9)                      | 1.2 (1.0-1.5)*         | 1.6 (1.3-2.0)                              | 1.3 (1.0-1.7)*         |
| Apolipoprotein A-I (mg/dL)           | 141 (123-162)                      | 129 (114-147)*         | 156 (139-176)                              | 147 (130-166)*         |
| Triglycerides (mmol/L)               | 1.5 (1.0-2.1)                      | 2.3 (1.6-3.3)*         | 1.5 (1.0-2.2)                              | 2.0 (1.4-3.0)*         |
| Body mass index (kg/m <sup>2</sup> ) | 24.6 (22.3-27.5)                   | 28.9 (26.1-32.2)*      | 25.7 (23.3-28.5)                           | 29.1 (26.3-32.8)*      |
| Lipid-lowering therapy (%)           | 1.1                                | 1.7                    | 8                                          | 43*                    |
| Hypertension (%)                     | 50                                 | 77*                    | 62                                         | 86*                    |
| Smoking (%)                          | 47                                 | 45                     | 24                                         | 24                     |
| Physical inactivity (%)              | 63                                 | 72*                    | 53                                         | 66*                    |

Values are median (interquartile range) or number (percent). Mann-Whitney U test or Pearson  $\chi^2$  test was used for continuous and categorical traits, respectively. Body mass index was measured weight (kg) divided by measured height squared (m<sup>2</sup>). Use of lipid-lowering therapy was self-reported. The risk factors, hypertension, smoking, and physical activity were dichotomized and defined as hypertension (systolic blood pressure  $\geq$ 140 mmHg or diastolic blood pressure  $\geq$ 90 mmHg and/or use of antihypertensive therapy); smoking as current smoking; physical inactivity was the fraction of individuals with less than 2-4 hours per week of light physical activity at leisure time. No.=number; HbA1c=Hemoglobin A1c; NA=not available; LDL=low-density lipoprotein; HDL=high-density lipoprotein. Measurements of HbA1c were available on 5,661 individuals in the Copenhagen City Heart Study. \*P<0.0001

**Supplementary Table 2.** Promoter and nonsynonymous variants in the *ABCA1* and *ABCG1* genes identified in the Copenhagen City Heart Study (CCHS) and in the CEU 1000 Genomes Project.

| Gene region  | Nucleotide substitution* | MAF (%) in CCHS<br>(no. of alleles=20,370) | MAF (%) in CEU 1000<br>Genomes Project<br>(no. of alleles=116-226) | Amino acid<br>residue | Reference SNP (rs)<br>number |
|--------------|--------------------------|--------------------------------------------|--------------------------------------------------------------------|-----------------------|------------------------------|
| <i>ABCA1</i> |                          |                                            |                                                                    |                       |                              |
| Promoter     | g.-413C>G                | 31.3                                       | 43.3                                                               | -                     | rs2740483                    |
| Promoter     | g.-354A>C                | Not identified                             | No frequency data                                                  | -                     | rs184242372                  |
| Promoter     | g.-328C>T                | 34.1                                       | 32.7                                                               | -                     | rs1800977                    |
| 5'UTR        | g.-279G>C                | 4.1                                        | 3.3                                                                | -                     | rs111292742                  |
| Exon 3       | c.103A>G                 | Not identified                             | 0.03 <sup>†</sup>                                                  | I35V                  | rs138992952                  |
| Exon 4       | c.254C>T                 | Not identified                             | 0.07 <sup>†</sup>                                                  | P85L                  | rs145183203                  |
| Exon 7       | c.551T>G                 | Not identified                             | 0.01 <sup>†</sup>                                                  | L184W                 | rs141420090                  |
| Exon 7       | c.634T>A                 | Not identified                             | 0.01 <sup>†</sup>                                                  | S212T                 | rs115216814                  |
| Exon 7       | c.656G>A                 | 26.0                                       | 20.8                                                               | R219K                 | rs2230806                    |
| Exon 11      | c.1196T>C                | 0.2                                        | 0.9                                                                | V399A                 | rs9282543                    |
| Exon 12      | c.1441G>T                | Not identified                             | No frequency data                                                  | V481L                 | rs183293176                  |
| Exon 15      | c.2020A>C                | Not identified                             | No frequency data                                                  | M674L                 | rs145105484                  |
| Exon 15      | c.2089G>A                | Not identified                             | 0.01 <sup>†</sup>                                                  | A697T                 | rs114620717                  |
| Exon 16      | c.2170G>A                | Not identified                             | No frequency data                                                  | V724M                 | rs138271089                  |
| Exon 16      | c.2311G>A                | 3.0                                        | 1.3                                                                | V771M                 | rs2066718                    |
| Exon 16      | c.2320A>C                | 0.2                                        | 0.3 <sup>†</sup>                                                   | T774P                 | rs35819696                   |
| Exon 16      | c.2328G>C                | 0.2                                        | 0.3 <sup>†</sup>                                                   | K776N                 | rs138880920                  |
| Exon 17      | c.2473G>A                | 6.0                                        | 8.5                                                                | V825I                 | rs2066715                    |
| Exon 18      | c.2602G>A                | Not identified                             | 0.01 <sup>†</sup>                                                  | E868K                 | rs35207495                   |
| Exon 18      | c.2649A>G                | 12.0                                       | 13.3                                                               | I883M                 | rs2066714                    |
| Exon 19      | c.2660G>T                | Not identified                             | 0.01 <sup>†</sup>                                                  | C887F                 | rs187652566                  |
| Exon 22      | c.3121C>G                | Not identified                             | No frequency data                                                  | L1041V                | rs192935024                  |
| Exon 24      | c.3515A>G                | Not identified                             | 0.01 <sup>†</sup>                                                  | E1172G                | rs142877738                  |

|                     |            |                |                   |        |             |
|---------------------|------------|----------------|-------------------|--------|-------------|
| Exon 24             | c.3516G>C  | 3.0            | 3.3               | E1172D | rs33918808  |
| Exon 25             | c.3542C>T  | Not identified | 0.2 <sup>†</sup>  | F1181A | rs76881554  |
| Exon 25             | c.3544G>A  | Not identified | 0.1 <sup>†</sup>  | A1182T | rs143180998 |
| Exon 28             | c.4030C>T  | Not identified | No frequency data | R1344W | rs193087674 |
| Exon 30             | c.4219G>A  | Not identified | No frequency data | A1407T | rs189206655 |
| Exon 35             | c.4760G>A  | 24.0           | 19.9              | R1587K | rs2230808   |
| Exon 37             | c.5020G>A  | Not identified | 0.04 <sup>†</sup> | V1674I | rs138422574 |
| Exon 40             | c.5398A>C  | 0.1            | 0.1 <sup>†</sup>  | N1800H | rs146292819 |
| Exon 43             | c.5774G>A  | Not identified | 0.3 <sup>†</sup>  | R1925Q | rs142688906 |
| Exon 50             | c.6729C>A  | Not identified | 0.01 <sup>†</sup> | D2243E | rs34879708  |
| <b><i>ABCG1</i></b> |            |                |                   |        |             |
| Promoter            | g.-1091G>A | 0.2            | No frequency data | -      | rs146451474 |
| Promoter            | g.-1082C>T | 0.6            | No frequency data | -      | rs140837853 |
| Promoter            | g.-1054G>T | Not identified | No frequency data | -      | rs188048293 |
| Promoter            | g.-841T>C  | 27.7           | 22.5              | -      | rs564010    |
| Promoter            | g.-785G>T  | Not identified | No frequency data | -      | rs144594264 |
| Promoter            | g.-768G>A  | 25.8           | 23.3              | -      | rs2234714   |
| Promoter            | g.-686G>A  | 0.1            | Not identified    | -      | New         |
| Promoter            | g.-638G>T  | Not identified | No frequency data | -      | rs192673417 |
| Promoter            | g.-576C>T  | Not identified | No frequency data | -      | rs185003565 |
| Promoter            | g.-530A>G  | 6.7            | 3.1               | -      | rs2234715   |
| Promoter            | g.-491G>T  | Not identified | No frequency data | -      | rs188964954 |
| Promoter            | g.-438T>G  | 0.03           | No frequency data | -      | rs181652186 |

|          |           |                |                   |       |             |
|----------|-----------|----------------|-------------------|-------|-------------|
| Promoter | g.-376C>T | 0.2            | 0.2 <sup>‡</sup>  | -     | rs72542412  |
| Promoter | g.-367G>A | 14.3           | 9.2               | -     | rs57137919  |
| Promoter | g.-335G>T | Not identified | No frequency data | -     | rs184756729 |
| Promoter | g.-311T>A | 0.4            | No frequency data | -     | rs138515663 |
| Promoter | g.-269G>A | 0.07           | Not identified    | -     | New         |
| Promoter | g.-224C>T | 0.06           | 0.2 <sup>‡</sup>  | -     | rs72542414  |
| Promoter | g.-217C>A | 4.5            | 2.6 <sup>‡</sup>  | -     | rs72542415  |
| Exon 2   | c.38G>A   | Not identified | 0.1 <sup>†</sup>  | S13N  | rs148797794 |
| Exon 6   | c.640T>G  | Not identified | No frequency data | S214A | rs139214949 |
| Exon 7   | c.775G>A  | Not identified | No frequency data | A259T | rs143199611 |
| Exon 9   | c.1003G>A | Not identified | No frequency data | R335Q | rs148226451 |
| Exon 10  | c.1208C>T | Not identified | No frequency data | T299M | rs139448062 |
| Exon 15  | c.1889C>T | 0.02           | Not identified    | S630L | New         |

\*Nucleotide 1 denotes A in the startcodon ATG in exon 2 of *ABCA1*, corresponding to base position 24,568 in reference sequence NG\_007981.1, and in exon 1 of *ABCG1*, corresponding to base position 53,133 in reference sequence AP001746. When minor allele frequencies were not available in the CEU 1000 Genomes Project (n=116-226 chromosomes), data were derived from <sup>†</sup>population cohorts participating in the National Heart, Lung and Blood Institute Exome Sequencing Project (NHLBI-ESP, <https://esp.gs.washington.edu/drupal>, n=4,548-4,552 chromosomes), or from <sup>‡</sup>Pharmacogenetics of Membrane Transporters (PHARMGKB\_PMT, <http://www.pharmgkb.org>, n=502 chromosomes). CCHS= the Copenhagen City Heart Study; CEU=Utah residents with ancestry from northern and western Europe; MAF=minor allele frequency; no.=number; rs=reference SNP; UTR=untranslated region.

SUPPLEMENTARY DATA

**Supplementary Table 3.** *ABCA1* and *ABCG1* haplotype frequencies and association with risk of type 2 diabetes in the general population.

| Haplotype*          | Without type 2 diabetes | With type 2 diabetes | P-value <sup>†</sup> | P-value after permutation <sup>‡</sup> |
|---------------------|-------------------------|----------------------|----------------------|----------------------------------------|
| <b><i>ABCA1</i></b> | N=18,792 <sup>§</sup>   | N=1,578 <sup>§</sup> |                      |                                        |
| GCGGTGAGGAGGA       | 0.204                   | 0.212                | 0.42                 | 0.37                                   |
| CCGGTGAGAGGGA       | 0.182                   | 0.191                | 0.36                 | 0.89                                   |
| CCGGTGAGGAGGA       | 0.149                   | 0.133                | 0.08                 | 0.99                                   |
| GCGGTGAGGAGAA       | 0.047                   | 0.049                | 0.70                 | 0.99                                   |
| CTGATGAGGAGGA       | 0.041                   | 0.036                | 0.38                 | 0.99                                   |
| CTGGTGAGGAGGA       | 0.034                   | 0.035                | 0.81                 | 1.00                                   |
| CCGGTGAGGAGAA       | 0.032                   | 0.034                | 0.56                 | 1.00                                   |
| CCGATGAGGAGGA       | 0.031                   | 0.034                | 0.57                 | 1.00                                   |
| CTGGTGAGGAGAA       | 0.024                   | 0.027                | 0.37                 | 1.00                                   |
| GCGATGAGGAGGA       | 0.023                   | 0.021                | 0.56                 | 1.00                                   |
| CTGATGAGGAGAA       | 0.023                   | 0.020                | 0.47                 | 1.00                                   |
| GCCGTGAGGAGGA       | 0.020                   | 0.016                | 0.24                 | 1.00                                   |
| CCGATGAGGAGAA       | 0.019                   | 0.019                | 1.00                 | 1.00                                   |
| GCGATGAGGAGAA       | 0.018                   | 0.019                | 0.62                 | 1.00                                   |
| GCGGTGAGAGGGA       | 0.011                   | 0.012                | 0.68                 | 1.00                                   |
| CCGATGAGGGGGA       | 0.010                   | 0.010                | 0.80                 | 1.00                                   |
|                     |                         |                      |                      |                                        |
| <b><i>ABCG1</i></b> | N=18,792 <sup>§</sup>   | N=1,578 <sup>§</sup> |                      |                                        |
| GCTGGACGTC          | 0.722                   | 0.737                | 0.19                 | 0.27                                   |
| GCCAGACATC          | 0.140                   | 0.146                | 0.47                 | 0.65                                   |
| GCCAGGCGTC          | 0.067                   | 0.055                | 0.06                 | 0.76                                   |
| GCCAGACGTA          | 0.039                   | 0.033                | 0.25                 | 0.96                                   |
| GCCGGACGTC          | 0.014                   | 0.013                | 0.94                 | 1.00                                   |

\*Haplotypes of the 13 common *ABCA1* and 10 common *ABCG1* variants in the following order (from left to right): *ABCA1* g.-413C>G, g.-328C>T, g.-279G>C, R219K (G>A), V399A (T>C), V771M (G>A), T774P (A>C), K776N (G>C), V825I (G>A), I883M (A>G), E1172D (G>C), R1587K (G>A), N1800H (A>C); *ABCG1* g.-1091G>A, G.-1082C>T, g.-841T>C, g.-768G>A, g.-686G>A, g.-530A>G, g.-376C>T, g.-367G>A, g.-311T>A, g.-217C>A. Only estimated haplotypes with frequencies above 1% were included. <sup>†</sup>P-values for haplotype frequencies in cases versus controls by Pearson  $\chi^2$  test. <sup>‡</sup>P-values obtained after 1000 permutations using the permutation testing option of Haploview. <sup>§</sup>Number of haplotypes, i.e. twice the number of participants without type 2 diabetes and with type 2 diabetes in the study.

SUPPLEMENTARY DATA

**Supplementary Figure 1.** Pairwise linkage disequilibria between 13 variants identified after screening the *ABCA1* gene in individuals with the lowest 1% and highest 1% HDL cholesterol levels in the Copenhagen City Heart Study and subsequently genotyped in the entire study.  $D'$  values in upper panel and  $r^2$  values in lower panel. Pairwise linkage disequilibrium was estimated using the software Haploview 4.2 ([www.broad.mit.edu/mpg/haploview/download.php](http://www.broad.mit.edu/mpg/haploview/download.php))

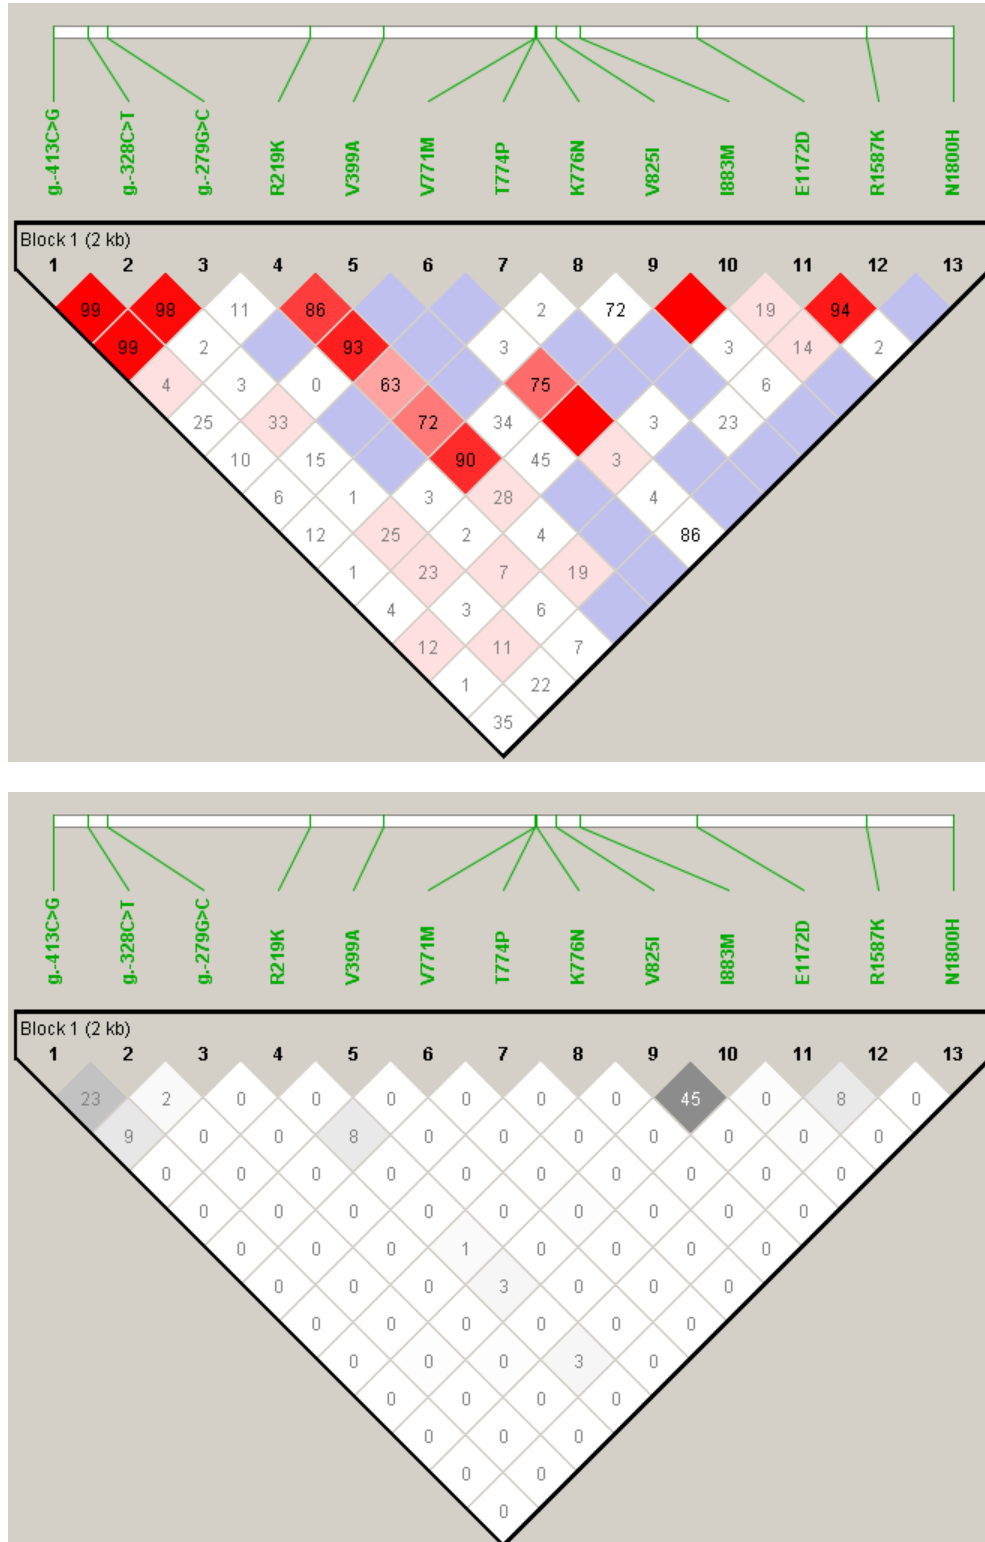

SUPPLEMENTARY DATA

**Supplementary Figure 2.** Pairwise linkage disequilibria between 10 variants identified after screening the *ABCG1* gene in individuals with the lowest 2% and highest 2% HDL cholesterol levels in the Copenhagen City Heart Study and subsequently genotyped in the entire study.  $D'$  values in upper panel and  $r^2$  values in lower panel. Pairwise linkage disequilibrium was estimated using the software Haploview 4.2 ([www.broad.mit.edu/mpg/haploview/download.php](http://www.broad.mit.edu/mpg/haploview/download.php)).

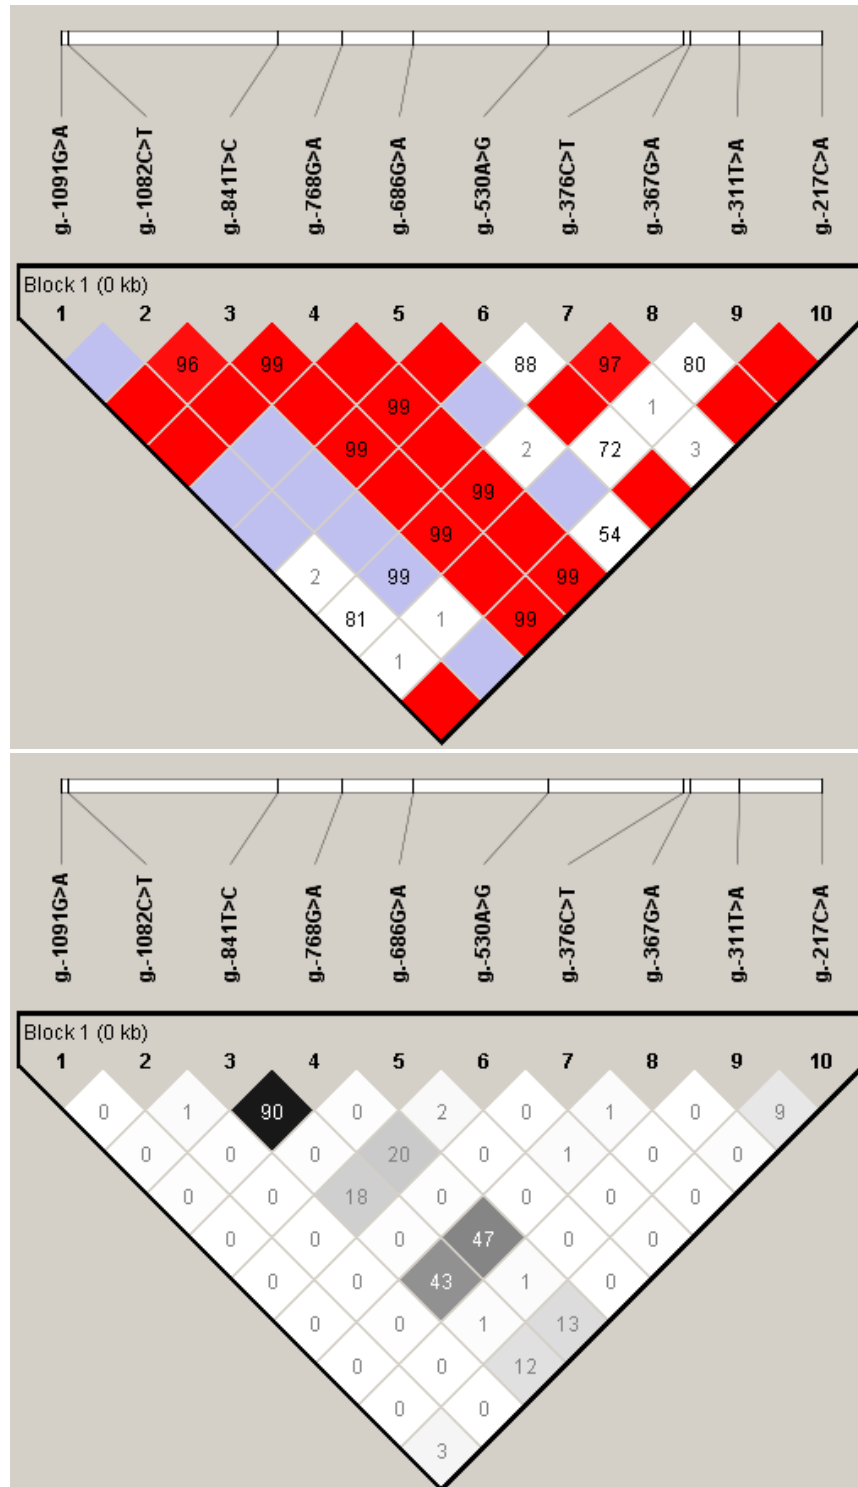

SUPPLEMENTARY DATA

**Supplementary Figure 3:** Risk of prediabetes as a function of *ABCA1* and *ABCG1* genotype in the Copenhagen City Heart Study. Prediabetes was defined as body mass index  $\geq 25$  kg/m<sup>2</sup>, HbA1c  $\geq 5.7\%$ , physical inactivity, and hypertension. Odds ratios were adjusted for age and sex. P-values from logistic regression or logistic regression trend test. CI=confidence interval.

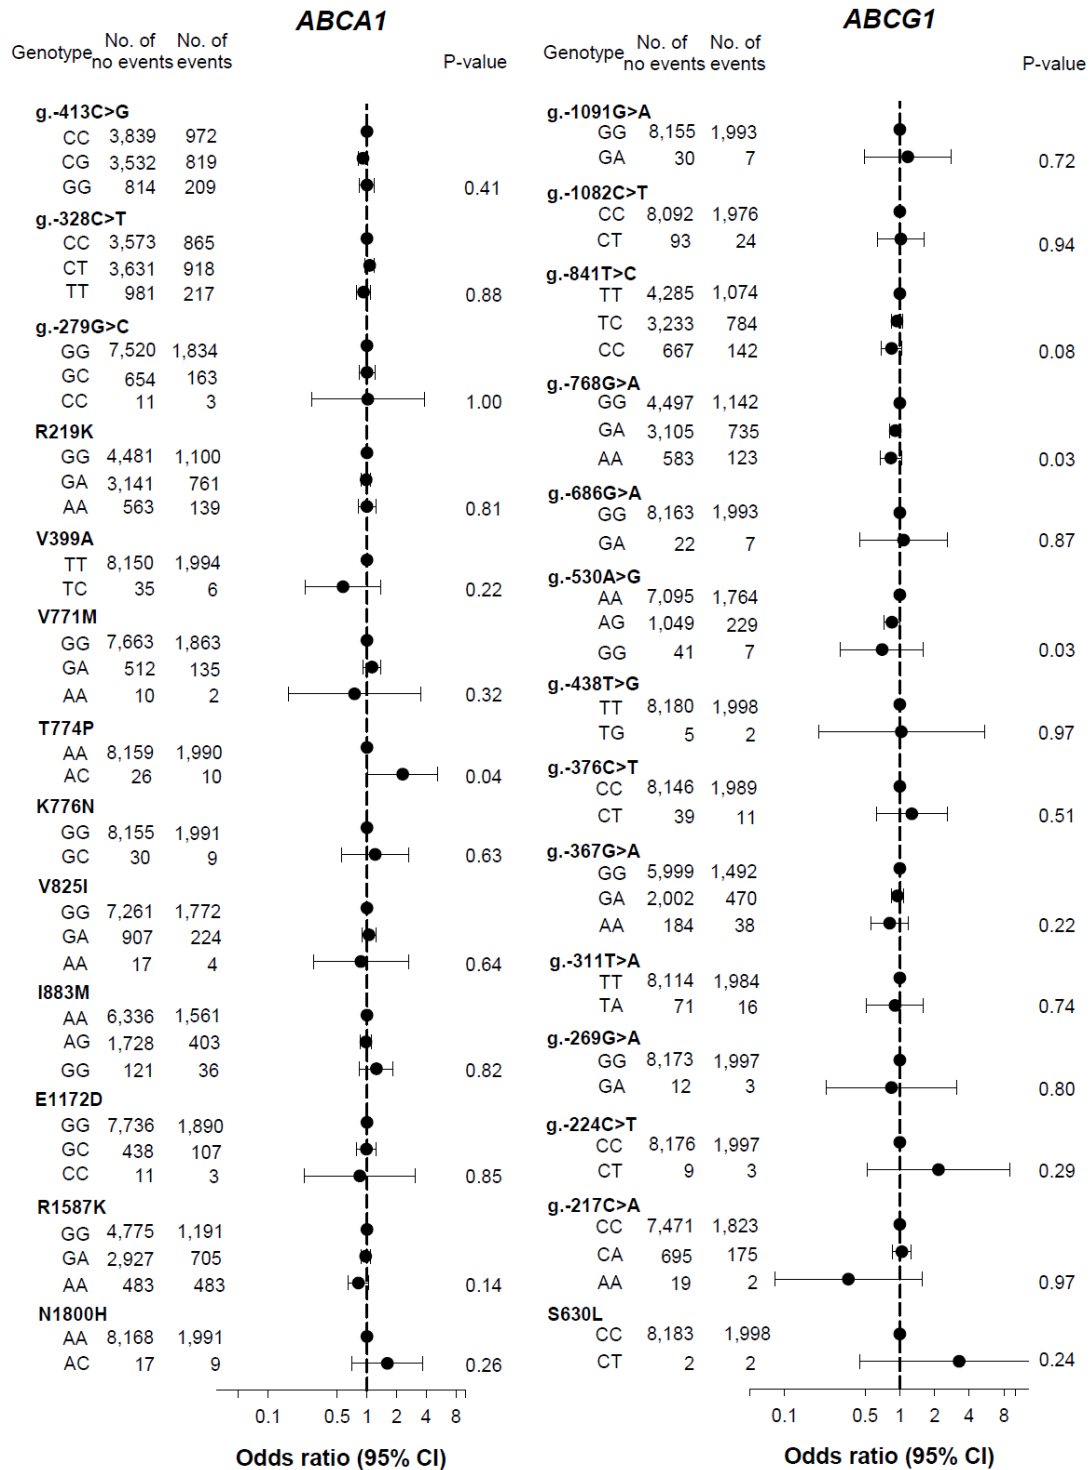

Supplement: supp_dc12-0082v120082_DC120082SupplementaryData.pdf [file supp_dc12-0082v120082_DC120082SupplementaryData.pdf]
